# Supplementary material
Source: MDPI journal article supplement (https://www.mdpi.com/2311-5637/8/9/452)
Supplement: s1 [file s1]

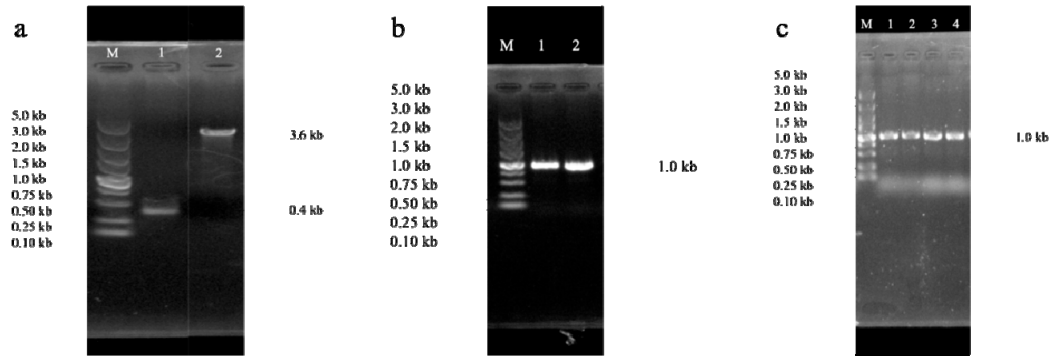

**Figure S1.** The results of agarose gel electrophoresis. (a) Digestion of pMG36e plasmid and the amplified *trxA* fragment with *salI* and *HindIII* to generate recombinant plasmid pMG36etrxA. Marker: DNA ladder (0.1-5.0 kb), Lane 1: *trxA* digested by *salI* and *HindIII* (0.4 kb), Lane 2: pMG36e digested by *salI* and *HindIII* (3.6 kb). (b) Colony PCR results of heterologous expression of pMG36etrxA in DH5α cells. Marker: DNA ladder (0.1-5.0 kb), Lane 1 and 2 are positive results for the colony PCR of pMG36etrxA in DH5α cells (1.0 kb). (c) Colony PCR results of heterologous expression of pMG36etrxA in WCFS1 cells. Marker: DNA ladder (0.1-5.0 kb), Lane 1, 2, 3 and 4 are positive results for the colony PCR of pMG36etrxA in WCFS1 (1.0 kb).

**Table S1.** Primers used for real-time quantitative PCR.

| Primer Name | Primer Sequence (5'-3')  | Sequence Length | Reference  |
|-------------|--------------------------|-----------------|------------|
| trxA-F      | GGCGTGACTGTGACTGATT      | 118             | This study |
| trxA-R      | CGACATCAATCTTGCCGAATT    |                 |            |
| trxA1-F     | TTTTGGGCGGATTGGTGT       | 104             | This study |
| trxA1-R     | TCAACGTCGAGCGAAGCA       |                 |            |
| trxA2-F     | CGACGCCAACCCTGAAAC       | 84              | This study |
| trxA2-R     | TCAACCACTTCGCCATCC       |                 |            |
| trxA3-F     | TCCCTTTCTGAAGACCCA       | 86              | This study |
| trxA3-R     | AATTGACTGGCCGTAGCT       |                 |            |
| trxH-F      | TTATTCTTTACGGCGGACTG     | 128             | This study |
| trxH-R      | TGGGCAATTTCAATGTTGG      |                 |            |
| trxB-F      | ATGAATCAGCGACCCAGTT      | 169             | This study |
| trxB-R      | TCCTCGCCAGTAACACCC       |                 |            |
| fdr-F       | TAAAGTCATCCGAAACTGG-CACG | 113             | This study |
| fdr-R       | TATCACCAATAGCCGCAATCCC   |                 |            |
| pMG36e-F    | TCGGTCCTCGGGATATGAT      | 1000            | This study |
| pMG36e-R    | ATGCCGATAACTAAACGAAA     |                 |            |
